# Supplementary material
Source: PubMed Central journal article supplement (PMC3428623)
Supplement: NIHMS49447-supplement-1.pdf [file NIHMS49447-supplement-1.pdf]

**Supplementary Information for Zuzuarregui et al. “M-TRACK: an approach for detecting short-lived protein-protein interactions *in vivo*”**

|                                                                                                        | Page      |
|--------------------------------------------------------------------------------------------------------|-----------|
| <b>Supplementary Figures</b>                                                                           | <b>2</b>  |
| Supplementary Figure 1: Biotin ligase assay of the interaction between PP2A-Cdc55 and Net1             | 2         |
| Supplementary Figure 2: Specificity of histone H3-K9 monoclonal antibodies                             | 3         |
| Supplementary Figure 3: Influence of various stress conditions on the assay system                     | 4         |
| Supplementary Figure 4: Functionality of the tagged Hog1 pathway proteins <i>in vivo</i>               | 6         |
| Supplementary Figure 5: Functionality of the tagged PP2A proteins <i>in vitro</i> and <i>in vivo</i>   | 7         |
| Supplementary Figure 6: Immunoprecipitation assays with H3-HA-Net1 <sup>1-600</sup> and myc-HKMT-Cdc55 | 8         |
| Supplementary Figure 7: M-TRACKing of the interaction between PP2A-Rts1 and Kin4                       | 9         |
| <br>                                                                                                   |           |
| <b>Supplementary Tables</b>                                                                            | <b>10</b> |
| Supplementary Table 1: <i>Saccharomyces cerevisiae</i> strains used in this study                      | 10        |
| Supplementary Table 2: Plasmids used in this study                                                     | 12        |
| Supplementary Table 3: Antibodies used in this study                                                   | 13        |
| <br>                                                                                                   |           |
| <b>Supplementary Notes</b>                                                                             | <b>14</b> |
| Supplementary Note 1: Biotin Ligase assay                                                              | 14        |
| Supplementary Note 2: Sequences                                                                        | 15        |
| <br>                                                                                                   |           |
| <b>Supplementary References</b>                                                                        | <b>16</b> |

## Supplementary Figures

### Supplementary Figure 1: Biotin ligase assay of the interaction between PP2A-Cdc55 and Net1

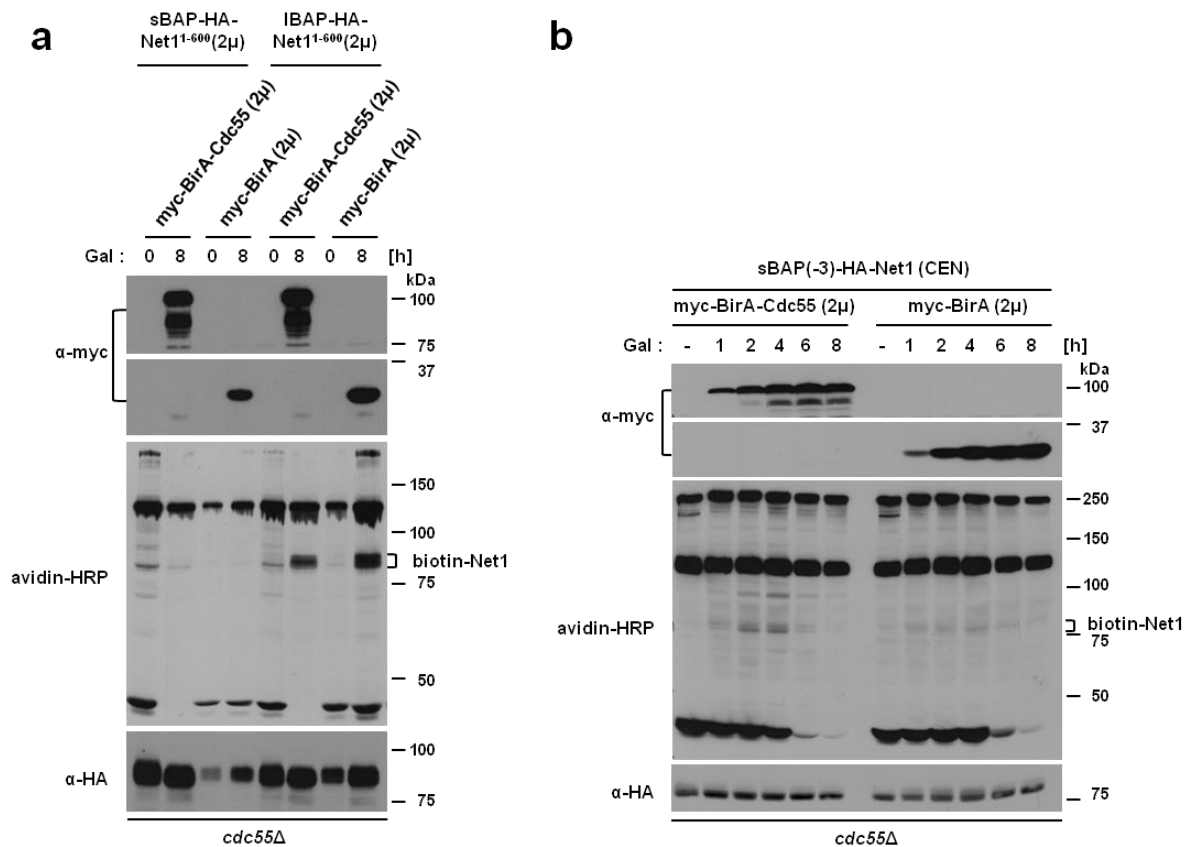

**(a)** At the indicated time of galactose induction, TCA lysates were prepared from a *cdc55Δ* strain expressing inducibly the bait myc-BirA-Cdc55 (2μ vector, PTK1) or myc-BirA (2μ vector, PTK2) and constitutively the prey sBAP-HA-Net1<sup>1-600</sup> (2μ vector; sBAP: GLNDIFEAQKIEWHE, PTK3) (TKY106/TKY107) or IBAP-HA-Net1<sup>1-600</sup> (2μ vector; IBAP: MASSLRQILDSQKMEWRSNAGGS, PTK4) (TKY108/TKY109). **(b)** At the indicated time of galactose induction, TCA lysates were prepared from a *cdc55Δ* strain expressing inducibly the bait myc-BirA-Cdc55 (2μ vector, PTK1) (YIF101) or myc-BirA (2μ vector, PTK2) (YIF102), both strains constitutively expressing the prey sBAP(-3)-HA-Net1<sup>1-600</sup> (CEN vector; sBAP(-3): GLNDIFEAQKIEGEF, PIF1). **(a,b)** Aliquots of lysates were analyzed by SDS-PAGE on separate gels, immunoblotted and incubated individually with avidin-HRP (1:5,000, Abcam) and specific antibodies against the HA- and the myc-tag.

**Supplementary Figure 2: Specificity of histone H3-K9 monoclonal antibodies**

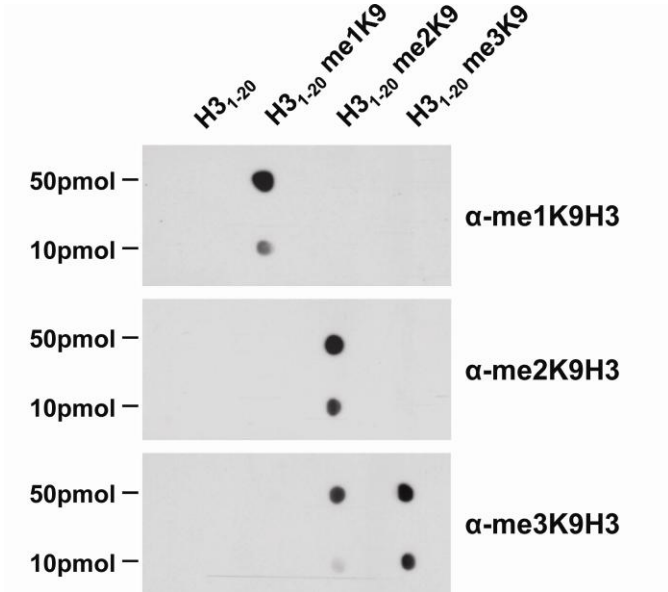

Dot blot assay with the indicated amounts of peptides corresponding to amino acids 1-20 of histone H3 and bearing either unmodified Lys9 or mono-, di-, or tri-methylated Lys9. Peptides were detected with monoclonal antibodies raised against the respective Lys9 modifications.

### Supplementary Figure 3: Influence of various stress conditions on the assay system

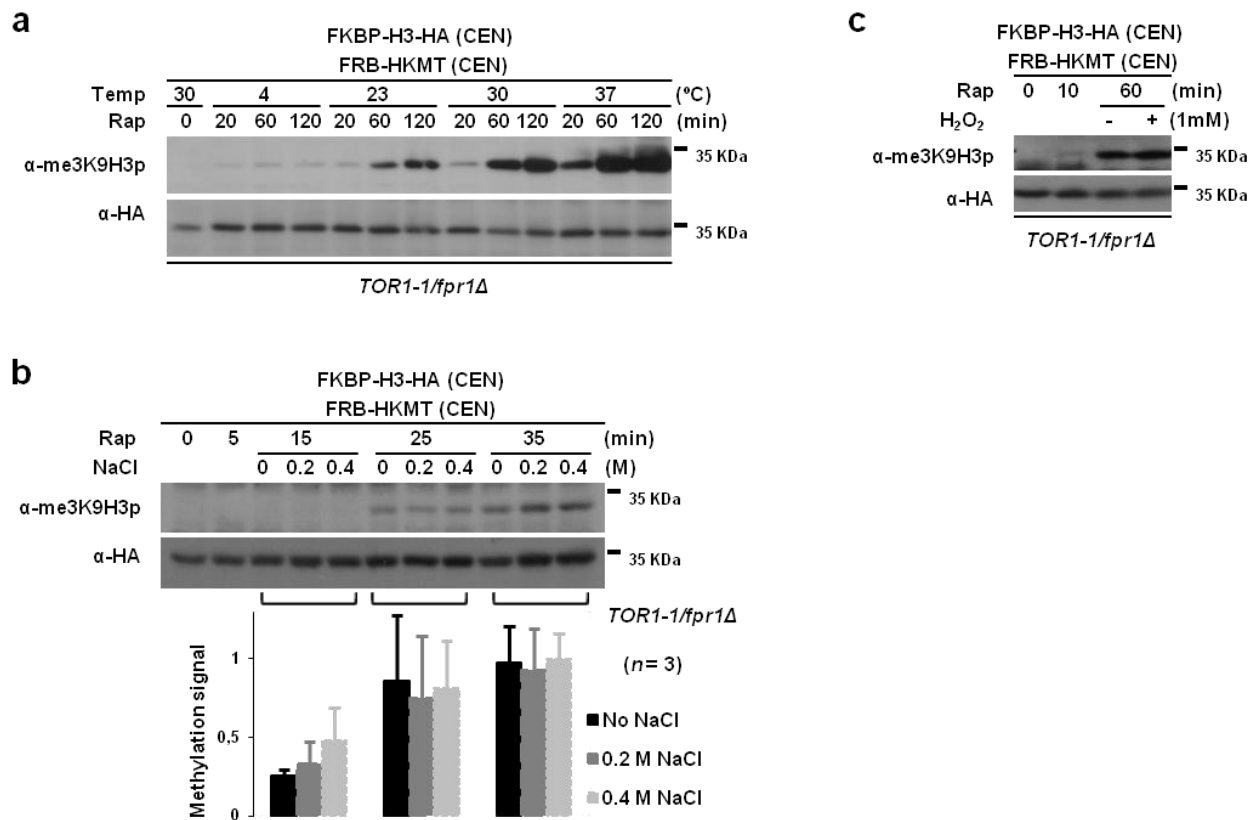

FKBP-H3-HA (PC192) and FRB-HKMT (PC42) were coexpressed in a rapamycin resistance strain (*TOR1-1/fpr1Δ*, YC70). Dimerization of FKBP and FRB was induced with rapamycin (Rap). Protein samples were separated by 12 % SDS-PAGE, transferred to Nitrocellulose membranes (Amersham Pharmacia), blocked (5 % NFDM in PBS-T 0.1 %) and incubated with polyclonal trimethyl antibody (1:3,000 in 3 % BSA, 2 h at RT). Membranes were washed in PBS-T 0.1 %, incubated with the secondary antibody (1:10,000  $\alpha$ -rabbit-HRP (GE Healthcare) in PBS-T 0.1 %) washed again and analyzed by ECL. The membranes were subsequently stripped (10 min in 2 M MgCl<sub>2</sub>, 0.1 M acetic acid at RT) and reprobed with HA antibody. **(a)** Testing for temperature sensitivity. Exponentially growing cultures at 30 °C were treated with rapamycin and immediately split into four parts that were grown at the indicated temperature. Samples were taken at the indicated time points and analyzed as described above. **(b)** Testing for salt sensitivity. After 5 minutes of rapamycin treatment samples were split and treated with water or salt at a final concentration of 0.2 and 0.4 M NaCl. Samples were taken at the indicated time points and analyzed as described above. This experiment was performed in triplicate and methylation and HA signal levels were quantified as described in the main methods section. 0 is the basal signal without induction,

and 1 is the maximum signal measured in this experiment. One representative western blot is shown. (c) Testing for oxidative conditions. After 10 minutes of rapamycin treatment samples were split and one half was treated with 1 mM H<sub>2</sub>O<sub>2</sub> for 50 minutes. Samples were taken at the indicated time points and analyzed as described above.

**Supplementary Figure 4: Functionality of the tagged Hog1 pathway proteins *in vivo***

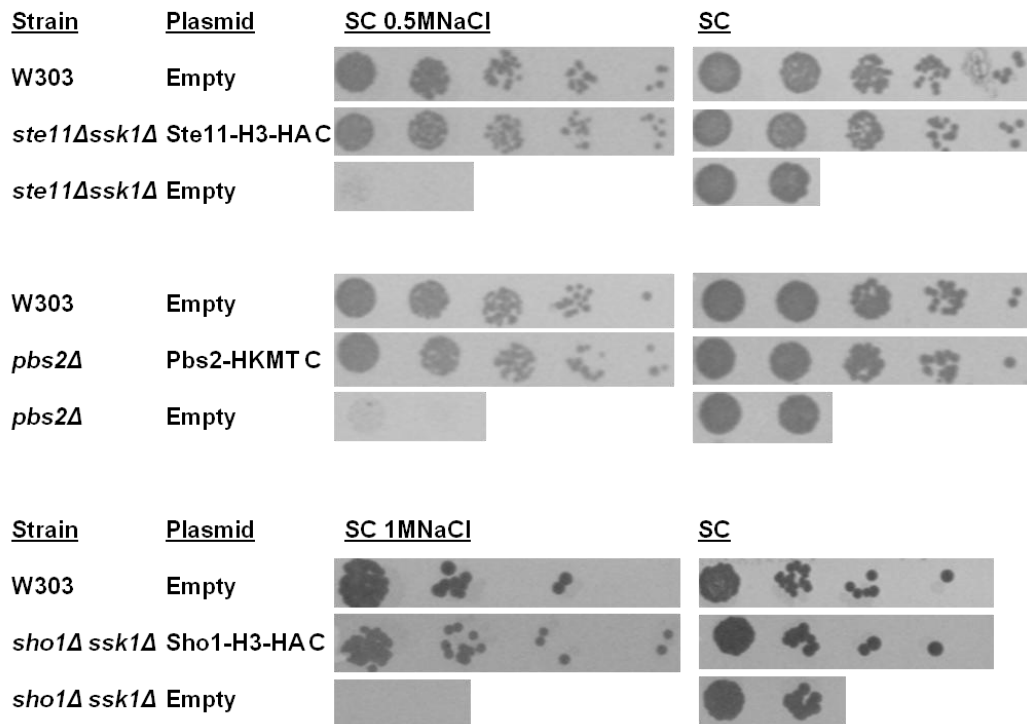

Ste11-H3-HA (CEN vector, PA119), Pbs2-HKMT (CEN vector, PC7), Hog1-HKMT (CEN vector, PC8) and Sho1-H3-HA (CEN vector, PI225) were transformed into *ste11Δ/ssk1Δ* (YC192), *pbs2Δ* (YVR10), *hog1Δ* (YPA185) or *sho1Δ/ssk1Δ* (YID155) strains, and salt sensitivity to 0.5 M NaCl (Ste11, Pbs2 and Hog1) or 1 M NaCl (Sho1) was tested by spotting different dilutions of exponentially growing cultures. As a positive control the wild-type strain was transformed with an empty plasmid and spotted onto the same plate. As a negative control the mutant strains were transformed with empty plasmids and also spotted onto the same plate.

**Supplementary Figure 5: Functionality of the tagged PP2A proteins *in vitro* and *in vivo***

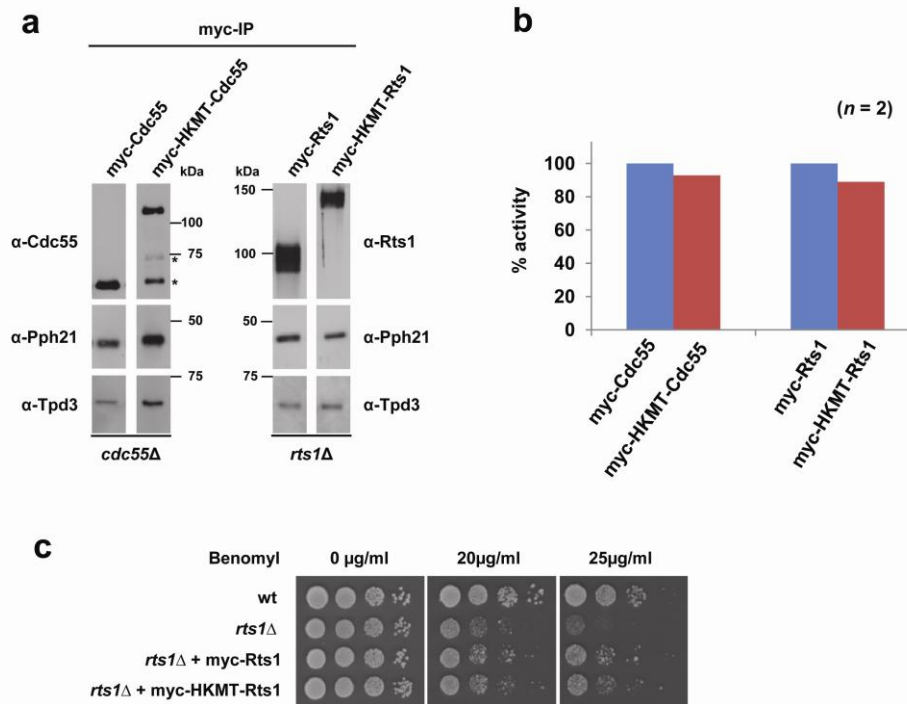

**(a)** Testing incorporation of the bait fusion-proteins into PP2A-holoenzymes. Anti-myc-immunoprecipitates from lysates of *cdc55Δ* and *rts1Δ* cells expressing either myc-Cdc55 (CEN vector, PIM101/YIM101), myc-Rts1 (CEN vector, PIM108/YIM103), myc-HKMT-Cdc55 (2μ vector, PIM102/YIM102) or myc-HKMT-Rts1 (2μ vector, PIM109/YIM104) were separated by SDS-PAGE and analyzed by immunoblotting with specific antibodies against Rts1, Cdc55, Pph21 and Tpd3. The anti-Pph21 blot was reprobbed with anti-Tpd3, while separate blots were used for the detection of Cdc55 and Rts1. Asterisks indicate degradation products. **(b)** *In vitro* phosphatase assay towards  $^{32}\text{P}$ -labeled phosphorylase a with immunoprecipitated PP2A complexes (obtained in the experiments shown in Supplementary Fig. 3a) ( $n = 2$ , mean of specific catalytic activity percentage, 100 % corresponds to the specific activity obtained by complexes containing myc-Cdc55 or myc-Rts1, respectively). **(c)** Testing *in vivo* functionality of the myc-HKMT-Rts1 fusion protein. Logarithmically growing cultures of wt (BY4741), *rts1Δ* (Y01790) and *rts1Δ* expressing myc-Rts1 (CEN vector, PIM108/YIM103) or myc-HKMT-Rts1 (2μ vector, PIM109/YIM104) were 10-fold serially diluted in YPD liquid medium, spotted on YPD-plates containing the indicated amounts of benomyl and incubated for 2-3 days at 30 °C.

**Supplementary Figure 6: Immunoprecipitation assays with H3-HA-Net1<sup>1-600</sup> and myc-HKMT-Cdc55**

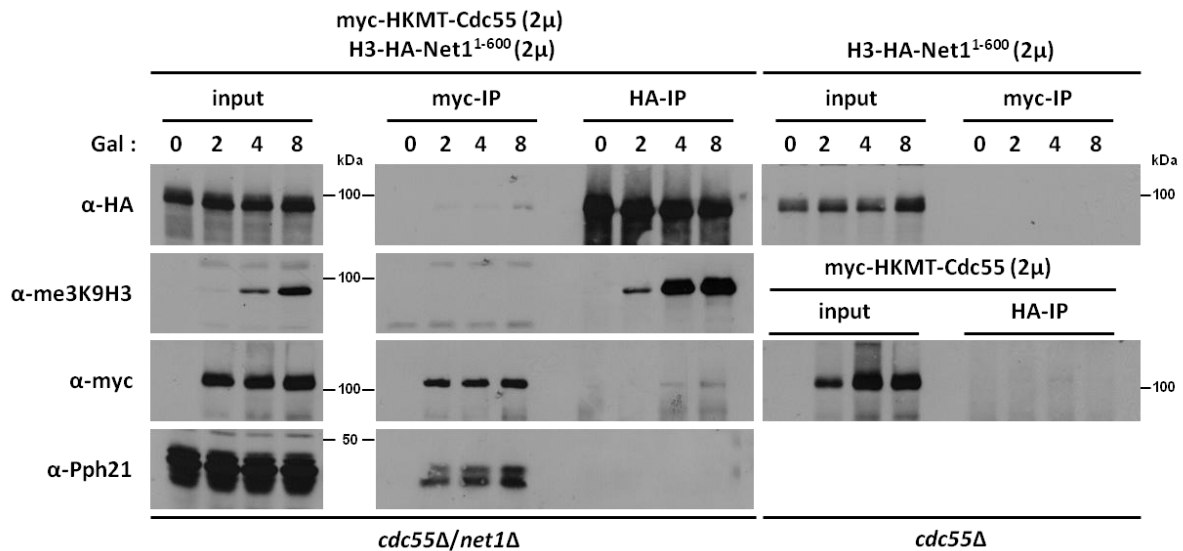

Anti-HA- and anti-myc-immunoprecipitates from lysates of *cdc55Δ/net1Δ* cells expressing H3-HA-Net1<sup>1-600</sup> (2μ vector, PIM105) and myc-HKMT-Cdc55 (2μ vector, PIM103) (TKY100) were analyzed by SDS-PAGE and immunoblotted with the indicated antibodies. Anti-myc-immunoprecipitates of *cdc55Δ* cells expressing only H3-HA-Net1<sup>1-600</sup> (2μ vector, PIM105) (TKY105) and anti-HA-immunoprecipitates of *cdc55Δ* cells expressing only myc-HKMT-Cdc55 (2μ vector, PIM103) (TKY104) served as negative controls. Input correlates to 1/20 of the lysate amounts used for the respective IP. The anti-myc incubated blot was reprobed with anti-me3K9H3 to test for the M-TRACKing of the Cdc55-Net1 interaction; the anti-HA incubated blot was reprobed with anti-Pph21 to test for PP2A holoenzyme assembly. Panels originate from the same exposure of the same blotting membrane incubated with the indicated antibody.



**Supplementary Figure 7: M-TRACKing of the interaction between PP2A-Rts1 and Kin4**

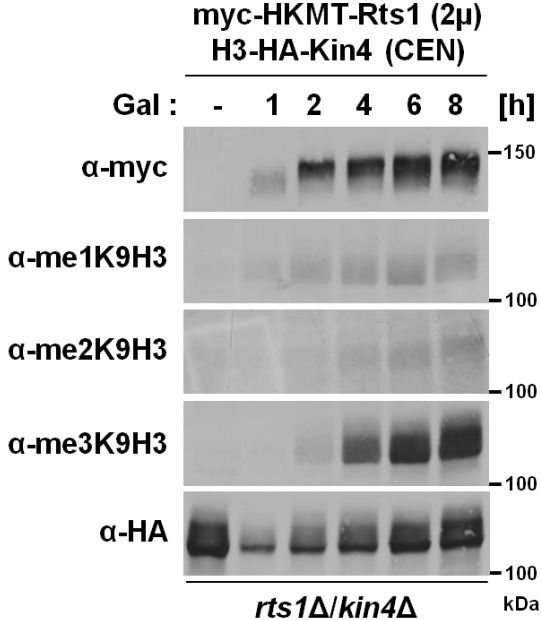

At the indicated time-points of galactose induction, TCA lysates were prepared from a *rts1Δ/kin4Δ* strain expressing inducibly the bait myc-HKMT-Rts1 (2μ vector, PIM107) and constitutively the prey H3-HA-Kin4 (CEN vector, PBB1) (YBB14). Lysates were analyzed by 7.5 % SDS-PAGE, immunoblotted onto separate membranes and incubated individually with specific antibodies against mono-, di-, tri-methylated K9H3, the HA- and the myc-tag.

## Supplementary Tables

**Supplementary Table 1:** *Saccharomyces cerevisiae* strains used in this study

| Name   | Relevant genotype                                                                                                            | Source or reference |
|--------|------------------------------------------------------------------------------------------------------------------------------|---------------------|
| W303   | Mat a, <i>ade2, trp1, can1, leu2, his3, ura3</i>                                                                             | Rodney Rothstein    |
| YC8    | W303 <i>ssk2::KanMx ssk22::KanMx</i>                                                                                         | S. Hohmann          |
| YC70   | W303 <i>TOR1-1 fpr1::NatMx</i>                                                                                               | This study          |
| YC192  | W303 <i>ste11::ade ssk1::his</i>                                                                                             | This study          |
| YC232  | W303 <i>sho1::his pbs2::kan TOR1-1 fpr1::NatMx</i>                                                                           | This study          |
| YID140 | W303 <i>ste11::ade pbs2::his</i>                                                                                             | This study          |
| YID155 | W303 <i>sho1::trp ssk1::leu</i>                                                                                              | This study          |
| YA151  | W303 <i>sho1::trp pbs2::his ssk2::KanMx ssk22::KanMx</i>                                                                     | This Study          |
| YVR10  | W303 <i>pbs2::his</i>                                                                                                        | <sup>1</sup>        |
| YPA185 | W303 <i>hog1::kan</i>                                                                                                        | Paula Alepuz        |
| BY4741 | Mat a; <i>his3Δ1; leu2Δ; met15Δ0; ura3Δ1</i>                                                                                 | Euroscarf           |
| YIM100 | BY4741 <i>YGL190c::HIS3MX6; pYES2-myc-HKMT-Cdc55-URA; pYX242-3H3-2HA-Net1(1-600)-LEU</i>                                     | This study          |
| YIM101 | BY4741 <i>YGL190c::HIS3MX6; pYX142-myc-Cdc55-URA</i>                                                                         | This study          |
| YIM102 | BY4741 <i>YGL190c::HIS3MX6; pYX242-myc-HKMT-Cdc55-URA</i>                                                                    | This study          |
| TKY100 | BY4741 <i>YGL190c::HIS3MX6; YJL076W::natNT2; pYX213-myc-HKMT-Cdc55-URA; pYX242-3H3-2HA-Net1(1-600)-LEU</i>                   | This study          |
| TKY101 | BY4741 <i>YGL190c::HIS3MX6; YJL076W::natNT2; pYES2-myc-HKMT-Cdc55-URA; pYX242-3H3-2HA-Net1(1-600)-LEU</i>                    | This study          |
| TKY102 | BY4741 <i>YGL190c::HIS3MX6; YJL076W::natNT2; pYES2-myc-HKMT-Cdc55-URA; pYX242-4H3-2HA-Net1(1-600)(S166A,T212A,S252A)-LEU</i> | This study          |
| TKY103 | BY4741 <i>YGL190c::HIS3MX6; pYX213-myc-HKMT-Cdc55-URA; pYX242-3H3-2HA-Net1(1-600)-LEU</i>                                    | This study          |
| TKY104 | BY4741 <i>YGL190c::HIS3MX6; pYX213-myc-HKMT-Cdc55-URA</i>                                                                    | This study          |
| TKY105 | BY4741 <i>YGL190c::HIS3MX6; pYX242-3H3-2HA-Net1(1-600)-LEU</i>                                                               | This study          |
| YIM103 | BY4741 <i>YOR014W::kanMX4; pYX142-myc-Rts1-URA</i>                                                                           | This study          |
| YIM104 | BY4741 <i>YOR014W::kanMX4; pYX242-myc-HKMT-Rts1-URA</i>                                                                      | This study          |
| YIM105 | BY4741 <i>YGL190c::HIS3MX6; pYES2-myc-HKMT-Cdc55-URA; pYX242-3H3-2HA-Net1(1-600)-LEU</i>                                     | This study          |
| YBB14  | BY4741 <i>YOR014W::kanMX4; YOR233W::natNT2; pYX213-myc-HKMT-Rts1-URA; pYX142-4H3-2HA-Kin4-LEU</i>                            | This study          |
| YBB19  | BY4741 <i>YOR014W::kanMX4; pYX213-myc-HKMT-Rts1-URA; pYX242-3H3-2HA-Net1(1-600)-LEU</i>                                      | This study          |

|                     |                                                                                              |              |
|---------------------|----------------------------------------------------------------------------------------------|--------------|
| YBB26               | BY4741 pYES2-myc-HKMT-GL-URA; pYX242-3H3-2HA-Net1(1-600)-LEU                                 | This study   |
| YPP1                | BY4741 <i>YGL190c::HIS3MX6</i>                                                               | <sup>2</sup> |
| Y01790<br>(Acc.no.) | BY4741 <i>YOR014W::kanMX4</i>                                                                | Euroscarf    |
| TKY106              | BY4741 <i>YGL190c::HIS3MX6</i> ; pYX213-myc-BirA-GL-Cdc55, pYX242-SBAP-2HA-GL-Net1(1-600)    | This study   |
| TKY107              | BY4741 <i>YGL190c::HIS3MX6</i> ; pYX213-myc-BirA-GL, pYX242-SBAP-2HA-GL-Net1(1-600)          | This study   |
| TKY108              | BY4741 <i>YGL190c::HIS3MX6</i> ; pYX213-myc-BirA-GL-Cdc55, pYX242-IBAP-2HA-GL-Net1(1-600)    | This study   |
| TKY109              | BY4741 <i>YGL190c::HIS3MX6</i> ; pYX213-myc-BirA-GL, pYX242-IBAP-2HA-GL-Net1(1-600)          | This study   |
| YIF101              | BY4741 <i>YGL190c::HIS3MX6</i> ; pYX213-myc-BirA-GL-Cdc55, pYX142-sBAP(-3)-HA-GL-Net1(1-600) | This study   |
| YIF102              | BY4741 <i>YGL190c::HIS3MX6</i> ; pYX213-myc-BirA-GL, pYX142-sBAP(-3)-HA-GL-Net1(1-600)       | This study   |

**Supplementary Table 2: Plasmids used in this study**

| <b>Plasmid</b> | <b>Description</b>                               | <b>Source reference</b> or |
|----------------|--------------------------------------------------|----------------------------|
| PC1            | Pbs2-FKBP-YCp22                                  | This study                 |
| PC7            | Pbs2-HKMT-YCp111                                 | This study                 |
| PC8            | Hog1-HKMT-YCp111                                 | This study                 |
| PC14           | Ste20-HKMT-YCp111                                | This study                 |
| PC18           | Ste50-HKMT-YCp111                                | This study                 |
| PC30           | Rga1-HKMT-YCp111                                 | This study                 |
| PC42           | <i>ADH1p</i> -FRB-HKMT-YCp111                    | This study                 |
| PC54           | Sho1-HKMT-YCp111                                 | This study                 |
| PC157          | Bem3-HKMT-YCp111                                 | This study                 |
| PC160          | <i>ADH1p</i> -Fus1-HKMT-YCp111                   | This study                 |
| PC165          | HKMT-Cdc42-YCp111                                | This study                 |
| PC181          | 4H3-3HA-Cdc42-YEp195                             | This study                 |
| PC192          | <i>ADH1p</i> -4H3-3HA-FKBP-YCp22                 | This study                 |
| PI225          | Sho1-4H3-3HA-YCp33                               | This study                 |
| PI228          | Sho1-4H3-3HA-YEp195                              | This study                 |
| PI389          | Sho1Y8A-4H3-3HA-YCp33                            | This study                 |
| PI395          | Sho1Y54M-4H3-3HA-YCp33                           | This study                 |
| PA119          | Ste11-4H3-3HA-YCp33                              | This study                 |
| PIM100         | pYES2-myc-HKMT-GL-Cdc55                          | This study                 |
| PIM101         | pYX142-myc-GL-Cdc55                              | This study                 |
| PIM102         | pYX242-myc-HKMT-GL-Cdc55                         | This study                 |
| PIM103         | pYX213-myc-HKMT-GL-Cdc55                         | This study                 |
| PIM104         | pYES2-myc-HKMT-GL                                | This study                 |
| PIM105         | pYX242-3H3-2HA-GL-Net1(1-600)                    | This study                 |
| PIM106         | pYX242-4H3-2HA-GL-Net1(1-600)(S166A,T212A,S252A) | This study                 |
| PIM107         | pYX213-myc-HKMT-GL-Rts1                          | This study                 |
| PIM108         | pYX142-myc-GL-Rts1                               | This study                 |
| PIM109         | pYX242-myc-HKMT-GL-Rts1                          | This study                 |
| PBB1           | pYX142-4H3-2HA-GL-Kin4                           | This study                 |
| PTK1           | pYX213-myc-BirA-GL-Cdc55                         | This study                 |
| PTK2           | pYX213-myc-BirA-GL                               | This study                 |
| PTK3           | pYX242-sBAP-2HA-GL-Net1(1-600)                   | This study                 |
| PTK4           | pYX242-IBAP-2HA-GL-Net1(1-600)                   | This study                 |
| PIF1           | pYX142-sBAP(-3)-HA-GL-Net1(1-600)                | This study                 |

**Supplementary Table 3: Antibodies used in this study**

| <b>Antibody</b>                     | <b>Description</b>                                | <b>Dilution for WB</b>        | <b>Source</b>             |
|-------------------------------------|---------------------------------------------------|-------------------------------|---------------------------|
| $\alpha$ -me3K9H3p <sup>(A)</sup>   | Rabbit polyclonal, n°2236                         | 1:3000                        | T. Jenuwein               |
| $\alpha$ -me3K9H3                   | Mouse monoclonal, clone 6F12-H4                   | 1:100 to 1:500 <sup>(E)</sup> | Millipore                 |
| $\alpha$ -me2K9H3                   | Mouse monoclonal, clone 5E5-G5                    | 1:20 to 1:100                 | This study                |
| $\alpha$ -me1K9H3                   | Mouse monoclonal, clone 7E7-H12                   | 1:50 to 1:100                 | This study                |
| $\alpha$ -rabbit-HRP <sup>(B)</sup> |                                                   | 1:10,000                      | GE Healthcare             |
| $\alpha$ -rabbit-HRP <sup>(C)</sup> |                                                   | 1:10,000                      | Jackson ImmunoResearch    |
| $\alpha$ -mouse-HRP                 |                                                   | 1:10,000                      | Jackson ImmunoResearch    |
| $\alpha$ -HA                        | Mouse monoclonal, clone 16B12                     | 1:20,000                      | Covance research products |
| $\alpha$ -HA <sup>(D)</sup>         | Mouse monoclonal, clone 12CA5                     | 1:5,000                       | <sup>3</sup>              |
| $\alpha$ -P-Hog                     | Rabbit polyclonal, $\alpha$ -P-p38 MAPK T180/Y182 | 1:4,000                       | Cell Signaling            |
| $\alpha$ -myc                       | Mouse monoclonal, clone 4A6                       | 1:1,000 <sup>(E)</sup>        | Millipore                 |
| $\alpha$ -Pph21                     | Rabbit polyclonal                                 | 1:10,000                      | <sup>3</sup>              |
| $\alpha$ -Tpd3                      | Mouse monoclonal, clone 5G2                       | 1:200                         | <sup>2</sup>              |
| $\alpha$ -Cdc55                     | Mouse monoclonal, clone 9D3H6                     | 1:300                         | This study                |
| $\alpha$ -Rts1                      | Rabbit polyclonal                                 | 1:10,000                      | This study                |

(A) Used for supplementary figure 3

(B) Used for HOG studies

(C) Used for PP2A studies

(D) Used for HA-Kin4 detection

(E) Dilution applies to supernatant produced in the laboratory

## Supplementary Notes

### Supplementary Note 1: Biotin ligase assay

A protein proximity assay based on biotin ligase (BirA) and a BirA-acceptor peptide (BAP) has been described recently in mammalian cells<sup>4, 5</sup>. No experimental evidence, however, has been provided for the ability of the biotin system to detect short-lived interactions. Thus, we tested the biotin ligase system for the ability to detect the enzyme-substrate interaction between PP2A-Cdc55 and its substrate Net1 (Supplementary Fig. 1a,b). We tagged Cdc55 N-terminally with the BirA-ligase and Net1 with 3 different versions of the BirA-acceptor site, short BAP (sBAP), long BAP (lBAP) (Supplementary Fig. 1a) and a mutant short BAP (sBAP(-3)) (Supplementary Fig. 1b). The latter had been generated by Fernández-Suárez et al. because of the high background detection these authors obtained with the short BAP substrate, which was due to the high affinity between BirA and sBAP.

In agreement with their data on the high background and unspecific detection we found that BirA on its own biotinylated the prey lBAP-Net1 to similar levels as the BirA-Cdc55 fusion protein. Moreover, the sBAP- and sBAP(-3)-tagged Net1 were hardly detectable with either BirA or BirA-Cdc55 despite the considerable expression of the bait and prey fusion proteins (with the exception of the very low sBAP-tagged Net1 levels in the BirA ligase only expressing strain; Supplementary Fig. 1a). Based on these and the published data, we think that the BirA ligase system - in contrast to M-TRACK - may not be suitable for detection of short-lived and/or dynamic protein interactions.

## Supplementary Note 2: Sequences

Sequence of the HKMT SET domain mutant H320R (amino acids 82-412) used for the methylation assay (the mutated amino acid is highlighted in bold):

CVRILKQFHKDLERELLRRHRSKTPRHLDPSLANYL VQKAKQRRALRRWEQELNAKRSHLG  
RITVENEVDLDGPPRAFVYINEYRVGEGITLNQVAVGCECQDCLWAPTGGCCPGASLHKFAY  
NDQGQVRLRAGLPIYECNSRCRCGYDCPNRVVQKGIRYDLCIFRTDDGRGWGVRTLEKIRKN  
SFVMEYVGEIITSEEAEERRGQIYDRQGATYLFDLDYVEDVYTVDAAYYGNIS**R** FVNHS CDPN  
LQVYNVFIDNLDERLPRIAFFATRTIRAGEELTFDYNMQVDPVDMESTRMDSNFGLAGLPGS  
PKKRVRIECKCGTESCRKYL F

Sequence of the 4xH3 3xHA tag (the first of the four H3-repeats is highlighted in bold):

gggatcccgaattcgg**gctcgtactaagcagaccgctcgc**aagtccaccggcggcaaggcc  
G I P N S **A R T K Q T A R K S T G G K A**  
**ccgcgcaagcagctggcc**cagatcccgaattcgggctcgtactaagcagaccgctcgc aag  
**P R K Q L A** Q I P N S A R T K Q T A R K  
tccaccggcggcaaggccccgcgcaagcagctggcccagatcccgaattcgggctcgtact  
S T G G K A P R K Q L A Q I P N S A R T  
aagcagaccgctcgc aagtccaccggcggcaaggccccgcgcaagcagctggcccagatc  
K Q T A R K S T G G K A P R K Q L A Q I  
ccgaattcgggctcgtactaagcagaccgctcgc aagtccaccggcggcaaggccccgcgc  
P N S A R T K Q T A R K S T G G K A P R  
aagcagctggcccagatctgcggccgc atcttttaccatacgatgttctgactatgcg  
K Q L A Q I C G R I F Y P Y D V P D Y A  
ggctatccctatgacgtcccggactatgcaggatcctatccat atgacgttccagattac  
G Y P Y D V P D Y A G S Y P Y D V P D Y  
gctgctcagtgcgccgc  
A A Q C G R

## Supplementary References

1. Reiser, V., Ruis, H. & Ammerer, G. *Mol. Biol. Cell* **10**, 1147-1161 (1999).
2. Hombauer, H. et al. *PLoS. Biol.* **5**, e155 (2007).
3. Fellner, T. et al. *Genes Dev.* **17**, 2138-2150 (2003).
4. Fernandez-Suarez, M., Chen, T.S. & Ting, A.Y. *J. Am. Chem. Soc.* **130**, 9251-9253 (2008).
5. Kulyyassov, A. et al. *J. Proteome Res.* **10**, 4416-4427 (2011).
